I. R. THOMSON, M.D.  
W. A. C. MUTCH, M.D.  
J. D. CULLIGAN, M.D.  
*Department of Anesthesia  
St. Boniface General Hospital  
409 Tache Avenue  
Winnipeg, Manitoba  
Canada R3H 2A6*

#### REFERENCES

1. Coriat P, Daloz M, Bousseau D, Fusciardi J, Echter E, Viars P: Prevention of intraoperative myocardial ischemia during non-cardiac surgery with intravenous nitroglycerin. *ANESTHESIOLOGY* 61:193-196, 1984
2. Thomson IR, Mutch WAC, Culligan JD: Failure of intravenous nitroglycerin to prevent intraoperative myocardial ischemia during fentanyl-pancuronium anesthesia. *ANESTHESIOLOGY* 61:385-395, 1984
3. Fusciardi J, Daloz M, Coriat P, Harari A, Ducardonet P, Viars P: Prevention of myocardial ischemia by nitroglycerin in patients with severe coronary artery disease undergoing non-cardiac surgery. *ANESTHESIOLOGY* 53:S80, 1980
4. Coriat P, Fusciardi J, Daloz M, Harari A, Ducardonet A, Viars P: Prevention de l'ischémie myocardique per-opératoire: Emploi d'une perfusion continue de trinitrial. *Ann Fr Anesth Reanim* 1:47-51, 1982
5. Mutch WAC, Culligan JD, Cote DD, Thomson IR: Hemodynamic effects of intravenous nitroglycerin: Importance of the delivery system. *Anesth Analg* 61:927-932, 1982

(Accepted for publication February 1, 1985.)

Anesthesiology  
63:123, 1985

### Early Detection of Malignant Hyperthermia

*To the Editor:*—It has been suggested that end-tidal CO<sub>2</sub> should be useful in the early detection of malignant hyperthermia (MH) and should be followed to gauge the effectiveness of therapy.<sup>1</sup> Although capnographs and mass spectrometers are proliferating in United States operating rooms, most anesthesiologists still do not have the ability to routinely monitor expired CO<sub>2</sub>. Gronert and Theye<sup>2</sup> found parallel increases in CO<sub>2</sub> production and O<sub>2</sub> consumption. By closing the circuit, the anesthesia machine becomes a "metabolic laboratory" and the measurement of whole-body O<sub>2</sub> consumption becomes straightforward.<sup>3</sup> Moderate leaks in the system are easily measured and have little effect on the accuracy of the O<sub>2</sub> consumption measurement. Therefore, all operating rooms have the capability to detect the early metabolic changes of MH.

On the basis of animal models, the O<sub>2</sub> consumption would be expected to increase by at least 30-50% if the patient has MH develop. Effective therapy with dantrolene will also be demonstrated by a decrease in O<sub>2</sub> consumption.<sup>4</sup> During treatment of MH, cooling is desirable so the circuit should be opened with high flows of oxygen and intermittently closed for 3-5-min periods

to follow O<sub>2</sub> consumption. Expiratory CO<sub>2</sub> monitoring would be a valuable complement to measurements of O<sub>2</sub> consumption. Whenever MH is suspected, the anesthesiologist should measure O<sub>2</sub> consumption.

R. K. BAUMGARTEN, M.D.  
WILLIAM J. REYNOLDS, M.D., PHD.  
*630 Alamo Heights Boulevard  
San Antonio, Texas*

#### REFERENCES

1. Triner, L, Sherman J: Potential value of expiratory carbon dioxide measurement in patients considered to be susceptible to malignant hyperthermia (letter to the editor). *ANESTHESIOLOGY* 55:482, 1981
2. Gronert GA, Theye RA: Halothane-induced porcine malignant hyperthermia—metabolic and hemodynamic changes. *ANESTHESIOLOGY* 44:36-43, 1976
3. Lowe HJ, Ernst EA: *The Quantitative Practice of Anesthesia—Use of the Closed Circuit*. New York, Williams and Wilkins, 1981
4. Gronert GA, Milde JH, Theye RA: Dantrolene in porcine malignant hyperthermia. *ANESTHESIOLOGY* 44:488-495, 1976

(Accepted for publication February 11, 1985.)

Anesthesiology  
63:123-124, 1985

### Respiratory Monitoring for Children Undergoing Radiation Therapy

*To the Editor:*—Pediatric patients often require sedation or general anesthesia to prevent movement during high-voltage radiation. Because personnel cannot be present during this 2- to 3-min period of radiation, the

anesthesiologist usually monitors such patients using closed-circuit television. However, resolution of the television monitor is poor, and movements of the chest or anesthesia bag are often impossible to see. Therefore,

Dhamee and Jablonski<sup>1</sup> designed a "light box" that rests on the abdomen or chest and thus makes any movement more obvious to the eye. Saunders and Humphrey<sup>2</sup> suggested amplifying the movements of the anesthesia bag by attaching a stick made of tongue depressors (and having a "flag" at the end of it) to the bag.

These monitoring devices are helpful but limited: although they identify chest movement, they provide no information regarding patency of the airway in the patient whose trachea is not intubated. Because of our concern that airway obstruction rapidly leads to hypoxemia in infants (a result of the high ratio of oxygen consumption to functional residual capacity), we monitor these patients using a pulse oximeter (Nellcor Pulse Oximeter Model N-100). Regardless of the anesthetic technique (we usually administer halothane and oxygen via insufflation), the sensor is applied to an extremity (either a finger or toe or across the foot) after the induction of anesthesia. While the patient is being positioned by the radiation therapists, we position the airway until respirations are unobstructed. At that time, the oximeter should report an oxyhemoglobin saturation of at least 96%; if saturation is less than 96%, the position of the airway is adjusted until saturation improves. The oximeter is placed near the head of the patient, and the television camera is adjusted to permit simultaneous viewing of the head and chest as well as

the oximeter. At this time, all personnel leave the room and radiation is administered. As long as saturation remains stable, we believe that the airway is patent; a decrease in saturation suggests airway obstruction and the need for immediate interruption of the procedure and repositioning of the patient.

Because the pulse oximeter also reports pulse rate, it has become our most important monitor for these patients. We believe that this device provides clinical information of greater importance than that provided by monitors of chest excursion.

RICHARD GLASER, M.D.  
*Resident in Anesthesia*

DENNIS M. FISHER, M.D.  
*Assistant Professor of Anesthesia and Pediatrics*  
*Department of Anesthesia*  
*University of California*  
*San Francisco, California 94143*

#### REFERENCES

1. Dhamee MS, Jablonski J: Monitoring of respiratory excursions (letter to the editor). *ANESTHESIOLOGY* 51:474-475, 1979
2. Saunders RJ, Humphrey M: A simple device for remote monitoring of respiration (letter to the editor). *ANESTHESIOLOGY* 55:609, 1981

(Accepted for publication February 11, 1985.)

Anesthesiology  
63:124-125, 1985

### Failure to Withdraw Flexible Fiberoptic Laryngoscope after Nasotracheal Intubation

*To the Editor:*—A 55-year-old man was scheduled for an open reduction and internal fixation of a fractured right mandible. He was sedated with diazepam and fentanyl. The nasal mucosa was anesthetized topically with 4% cocaine, while the laryngotracheal mucosa was anesthetized by injecting 3 ml 4% xylocaine through the cricothyroid membrane. Following this, an 8 mm ID Shiley® endotracheal tube was placed inside the nasal passage. A well-lubricated Machida flexible intubation scope FLS-6-50®\* (fiberscope) was advanced through the endotracheal tube and into the pharynx and after visualizing the vocal cords into the trachea. The endotracheal tube then was threaded over the fiberscope and into the trachea. After successful completion of the

intubation, the fiberscope could not be withdrawn from inside the endotracheal tube. The cause was unknown, and after a few gentle attempts to withdraw the fiberscope failed, the nasotracheal tube and the fiberscope were removed together. It was then discovered that the fiberscope had been passed through the lateral opening (Murphy eye) of the endotracheal tube. The size of this particular opening is just large enough to accept the insertion cord of the Machida FLS-6-50® fiberscope, which has an external diameter of 6.0 mm. Passage and advancement of the fiberscope through the lateral opening of the endotracheal tube is possible, but withdrawal is difficult because of the acute angle that the insertion cord takes and its tight fit in this small opening. This complication was encountered on two other occasions, and each time the cause of the problem was predicted and the fiberscope and endotracheal tube were removed together. In all three instances the fiberscope was easily

\* Machida America Inc., 65 Oak Street, Norwood, New Jersey 07648.
